# Supplementary material for: High-resolution NMR-based metabolic detection of microgram biopsies using a 1 mm HRμMAS probe
Source: Royal Society of Chemistry journal article supplement (doi:10.1039/c5an01810b), 2015-01-01
Supplement: c5an01810b1.pdf [file c5an01810b1.pdf]

## ESI

### High-resolution NMR-based metabolic detection of microgram biopsies using a 1 mm HRμMAS probe

Yusuke Nishiyama,<sup>a,b</sup> Yuki Endo,<sup>a</sup> Takahiro Nemoto,<sup>a</sup> Anne-Karine Bouzier-Sore,<sup>c</sup> and Alan Wong\*<sup>d</sup>

<sup>a</sup> JEOL Ltd., 3-1-2 Musashino, Akishima, Tokyo 196-8558, Japan

<sup>b</sup> RIKEN CLST-JEOL Collaboration Center, Tsurumi, Yokohama, Kanagawa 230-0045, Japan

<sup>c</sup> Centre de Résonance Magnétique des Systèmes Biologiques, CNRS-Université de Bordeaux, UMR5536, Bordeaux, France

<sup>d</sup> CEA Saclay, DSM, IRAMIS, CEA/CNRS UMR3685–NIMBE, Laboratoire Structure et Dynamique par Résonance Magnétique, F-91191, Gif-sur-Yvette Cedex, France

\*corresponding author: AW [alan.wong@cea.fr](mailto:alan.wong@cea.fr)

---

|                                             |       |
|---------------------------------------------|-------|
| Sample preparation                          | p2    |
| NMR experimental details                    | p2-3  |
| Fig. S1. Kel-F rotor                        | p4    |
| Fig. S2. 2D TOCSY and COSY spectra          | p5    |
| Tab. S1. Probe comparison                   | p6    |
| Tab. S2. Coefficient of variation in Fig 1b | p7-10 |

## Sample preparation

Chicken and pig livers were purchased from a local supermarket. The rat [3-<sup>13</sup>C]lactate infused brain biopsy<sup>1</sup> and [1-<sup>13</sup>C]glucose infused brain extract<sup>2</sup> were obtained by Dr. Anne-Karine Bouzier-Sore (Centre RMSB, Bordeaux). The sample preparation for HRμMAS was performed under a stereomicroscope. A small biopsy was cut from the frozen liver using a surgical scalpel, and placed directly at the entrance of the Kel-F rotor (see Fig S1). Using a clean micro-drill bit with a diameter of 400 μm, gently pushed the frozen biopsy into the rotor. Filled the rotor with D<sub>2</sub>O using a 20 μl GELoader® tip (Eppendorf, US), and closed with the Kel-F inserts. The entire sample-preparation period was about 5-10 minutes.

- 1 D. Sampol, E. Ostrofet, M-L. Jobin, G. Raffard, S. Sanchez, V. Bouchaud, J-M. Franconi, G. Bonvento and A-K. Bouzier-Sore, *Front. Neuroenerg.*, 2013, **5**, 5.
- 2 A-K. Bouzier-Sore, P. Voisin, V. Bouchaud, E. Bezancou, J.M. Franconi and L. Pellerin, *Eur. J. Neurosci.*, 2006, **24**, 1687–1694.

## NMR experimental details

<sup>1</sup>H NMR experiments were carried out on a JEOL spectrometer operating at 600.17 MHz (B<sub>0</sub> = 14.1 T) with a 1 mm HRμMAS probe (more detailed in text) using the <sup>1</sup>H-channel for detection and X-channel for <sup>2</sup>H-lock. A costume-made 1 mm Kel-F MAS rotor was used. The MAS frequency was manually adjusted to 2000 – 2500 Hz with stability of ±10 Hz. All <sup>1</sup>H NMR experiments were recorded under a <sup>2</sup>H-lock (expected for HMQC) with a continuous-wave (CW) pulse applied during the 1 s recycle-delay for suppressing the HDO resonance. The π/2-pulse length was set to 1.2 μs at 20 W. The B<sub>0</sub> shimming was performed on a sucrose-D<sub>2</sub>O solution prior to the specimens. <sup>1</sup>H chemical shifts were internally referenced to the alanine –CH<sub>3</sub>–doublet at δ = 1.47 ppm.

The 1D <sup>1</sup>H NMR spectra were carried out with t<sub>2</sub>-edited CPMG pulse-experiment. A spin-echo delay of 0.4 ms with 250 of echo loops were used, resulting a total echo time of 100 ms. A total of 8192 data points was acquired using a spectral width ranging from 10 ppm to 18.6 ppm rendering a scan repetition time of 1.7 s to 3.2 s. The total experimental times were in the range of 10 to 30 minutes depending on the number of scans acquired.

The 2D <sup>1</sup>H-<sup>1</sup>H TOCSY spectrum of brain biopsy, which had been infused with [3-<sup>13</sup>C]lactate, was acquired with a DIPSI2 train pulses during the spin-lock. A mixing time of 50 ms was used. A spectral dimension of 5 ppm × 5 ppm was applied with 256 data point in t<sub>1</sub> and 2048 in t<sub>2</sub>. A total of 64 scans was collected per t<sub>1</sub>, resulting a total experimental time of 7 hours.

The 2D <sup>1</sup>H-<sup>13</sup>C HMQC spectrum of [3-<sup>13</sup>C]lactate infused brain biopsy was recorded without the <sup>2</sup>H-lock, as the X-channel was used for the <sup>13</sup>C resonance. A <sup>13</sup>C-decoupled CW pulse was applied during the <sup>1</sup>H data acquisition. A spectral dimension of 15 ppm (<sup>1</sup>H) × 15 ppm (<sup>13</sup>C) was applied with 128 data point in t<sub>1</sub> and 8192 in t<sub>2</sub>. A total of 448 scans was collected per t<sub>1</sub>, resulting a total experimental time of 27.5 hours.

The 2D <sup>1</sup>H-<sup>1</sup>H TOCSY spectrum of [1-<sup>13</sup>C]glucose infused brain extract was carried

out with a DIPSI2 train pulses during the spin-lock. A mixing time of 50 ms was used. A spectral dimension of 4 ppm  $\times$  4 ppm was applied with 196 data point in  $t_1$  and 2048 in  $t_2$ . A total of 64 scans was collected per  $t_1$ , resulting a total experimental time of 5.8 hours.

The 2D  $^1\text{H}$ - $^1\text{H}$  COSY spectrum of [ $1\text{-}^{13}\text{C}$ ]glucose infused brain extract was acquired with a phase sensitive COSY pulse experiment. A spectral dimension of 4 ppm  $\times$  4 ppm was applied with 512 data point in  $t_1$  and 1280 in  $t_2$ . A total of 16 scans was collected per  $t_1$ , resulting a total experimental time of 3.2 hours.

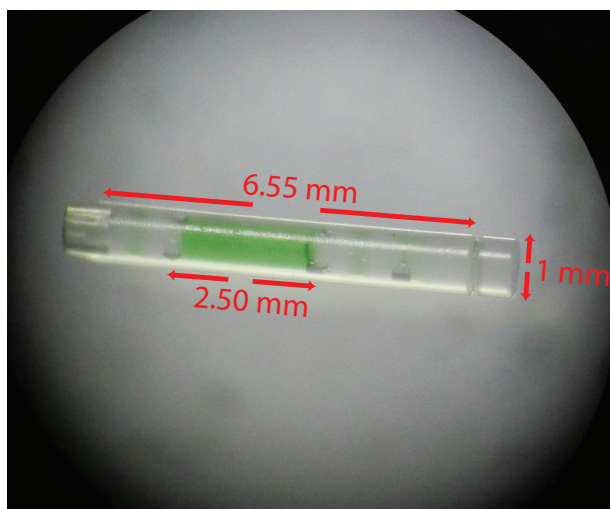

Fig. S1. A photo-illustration of a Kel-F MAS rotor. It was taken under the stereomicroscope. The rotor is filled with a green inorganic solution for showing the sample region. The rotor dimensions: 6.55 mm in length, 1 mm in outer diameter and 0.5 mm in inner diameter. The total NMR detectable sample volume is about 490  $\mu$ l.

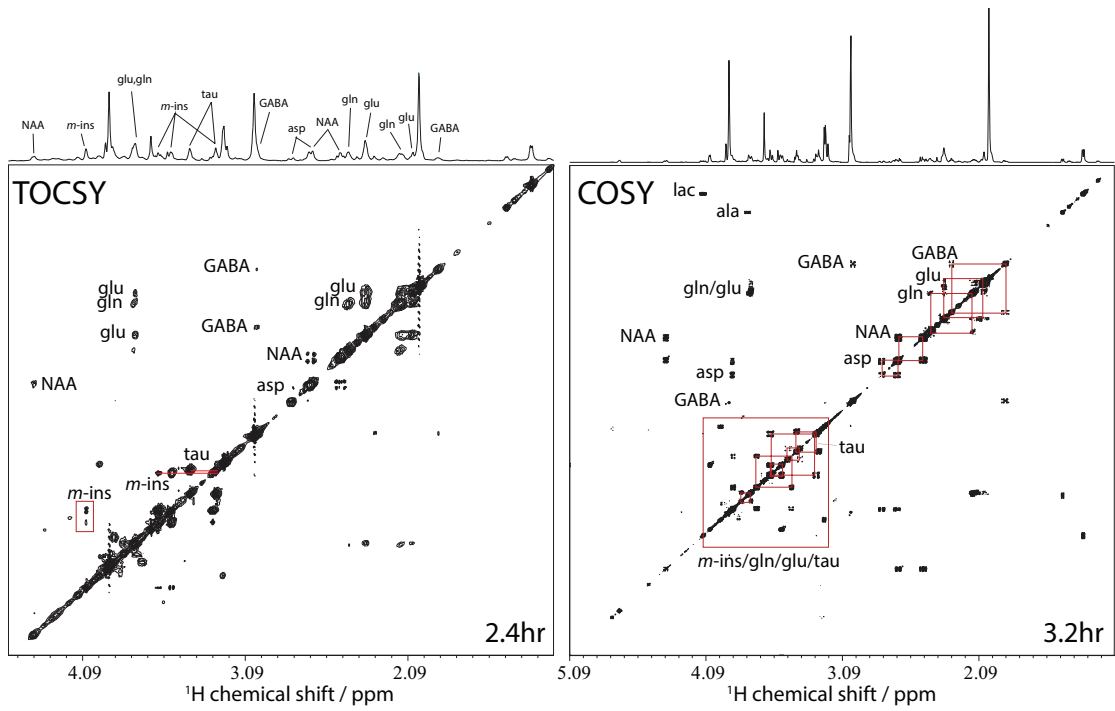

Fig. S2.  $^1\text{H}$ - $^1\text{H}$  TOCSY and  $^1\text{H}$ - $^{13}\text{C}$  HMQC HR $\mu$ MAS spectrum of a [ $1\text{-}^{13}\text{C}$ ]glucose infused brain extract.

Tab. S1. A comparison of the probe properties and NMR performances between 4mm HRMAS, 1mm HR $\mu$ MAS and 840 $\mu$ m HRMACS

|                                                                   | <b>HRMAS (Bruker)<sup>a</sup></b> | <b>HR<math>\mu</math>MAS prototype (JEOL)</b> | <b>HRMACS<sup>b</sup></b>                                                 |
|-------------------------------------------------------------------|-----------------------------------|-----------------------------------------------|---------------------------------------------------------------------------|
| Coil diameter                                                     | Fixed with 4 mm                   | Fixed with 1 mm                               | Flexible <sup>b</sup>                                                     |
| Probe durability                                                  | Strong                            | Strong                                        | Weak                                                                      |
| Detection volume                                                  | 30 $\mu$ l with a Kel-F insert    | $\sim$ 490 nl                                 | $\sim$ 250 nl                                                             |
| <sup>1</sup> H frequency                                          | 500 MHz                           | 600 MHz                                       | 500 MHz                                                                   |
| Unloaded coil quality factor                                      | 120                               | 150                                           | 30 – 40                                                                   |
| B <sub>1</sub> homogeneity (I <sub>450°</sub> /I <sub>90°</sub> ) | 0.9                               | 0.95                                          | 0.70 – 0.75                                                               |
| Probe efficiency (B <sub>1</sub> /P <sup>0.5</sup> ) <sup>c</sup> | 0.15 mT/W                         | 1.10 mT/W                                     | 1.00 mT/W                                                                 |
| Resolution                                                        | 0.002 ppm                         | $\sim$ 0.002 ppm                              | 0.001 ppm                                                                 |
| Sample holder                                                     | Disposable Kel-F insert           | Disposable Kel-F rotor                        | Disposable glass capillary                                                |
| MAS frequency                                                     | Up to 10,000 Hz                   | Up to 10,000 Hz                               | <500 Hz                                                                   |
| 1D experiment                                                     | Flexible                          | Flexible                                      | Spinning sideband suppression                                             |
| 2D experiment                                                     | Flexible                          | Flexible                                      | Only <sup>1</sup> H-detected experiments; caution with spinning sidebands |
| Data repeatability                                                | Good                              | Good                                          | Modest                                                                    |

- a) A <sup>1</sup>H/<sup>31</sup>P/<sup>13</sup>C elongated HRMAS probe adapts to a widebore magnet.  
b) The values and properties stated in the table correspond to the current design of a 840 $\mu$ m HRMACS resonator<sup>1</sup> with a frequency of 500  $\pm$  20 MHz.  
c) Based on the reciprocity principle,<sup>2</sup> the probe efficiency B<sub>1</sub>/P<sup>0.5</sup> (where B<sub>1</sub> is the RF magnetic field at a given transmitter power P) is directly proportional to the detection sensitivity of a probe.

1. A. Wong, X. Li and D. Sakellariou, *Anal. Chem.*, 2013, **85**, 2021–2026.
2. D. I. Hoult and R. E. Richards, *J. Magn. Reson.*, 1976, **24**, 71–85.

Tab. 1S. The coefficient values (%) on each of the chemical shift bucket (0.005ppm) intensity (average sum) between 3.4 – 4.3 ppm of the 24 overlay spectra shown in Fig. 1b. These values are plotted as a column representation in Fig. 1b.

| <b>Chemical shift bucket (ppm)</b> | <b>Mean intensity of 24 spectra</b> | <b>SD of 24 spectra</b> | <b>CV(%) of 24 spectra</b> |
|------------------------------------|-------------------------------------|-------------------------|----------------------------|
| 3.405                              | 0.1566                              | 0.03225                 | 20.59386973                |
| 3.41                               | 0.1714                              | 0.03229                 | 18.83897316                |
| 3.415                              | 0.1855                              | 0.03292                 | 17.74663073                |
| 3.42                               | 0.1942                              | 0.03204                 | 16.4984552                 |
| 3.425                              | 0.2102                              | 0.03284                 | 15.62321598                |
| 3.43                               | 0.2255                              | 0.03176                 | 14.08425721                |
| 3.435                              | 0.242                               | 0.03317                 | 13.70661157                |
| 3.44                               | 0.2539                              | 0.03247                 | 12.78849941                |
| 3.445                              | 0.2711                              | 0.03397                 | 12.53043158                |
| 3.45                               | 0.2895                              | 0.03382                 | 11.68221071                |
| 3.455                              | 0.32                                | 0.03446                 | 10.76875                   |
| 3.46                               | 0.3872                              | 0.03732                 | 9.638429752                |
| 3.465                              | 0.8557                              | 0.0399                  | 4.662849129                |
| 3.47                               | 0.4033                              | 0.02379                 | 5.898834614                |
| 3.475                              | 0.4571                              | 0.0365                  | 7.985123605                |
| 3.48                               | 1.316                               | 0.1011                  | 7.682370821                |
| 3.485                              | 0.6242                              | 0.09423                 | 15.09612304                |
| 3.49                               | 0.3364                              | 0.01632                 | 4.85136742                 |
| 3.495                              | 0.653                               | 0.07704                 | 11.79785605                |
| 3.5                                | 0.5979                              | 0.08055                 | 13.47215253                |
| 3.505                              | 0.2243                              | 0.01974                 | 8.80071333                 |
| 3.51                               | 0.2142                              | 0.02244                 | 10.47619048                |
| 3.515                              | 0.2162                              | 0.02439                 | 11.28122109                |
| 3.52                               | 0.2193                              | 0.02613                 | 11.91518468                |
| 3.525                              | 0.2239                              | 0.02728                 | 12.18401072                |
| 3.53                               | 0.2337                              | 0.02856                 | 12.22079589                |
| 3.535                              | 0.2478                              | 0.03097                 | 12.49798224                |
| 3.54                               | 0.2664                              | 0.03223                 | 12.09834835                |
| 3.545                              | 0.2956                              | 0.03348                 | 11.32611637                |
| 3.55                               | 0.3465                              | 0.03719                 | 10.73304473                |
| 3.555                              | 0.4762                              | 0.04545                 | 9.544309114                |
| 3.56                               | 0.9841                              | 0.03856                 | 3.918300986                |
| 3.565                              | 0.9918                              | 0.03602                 | 3.631780601                |
| 3.57                               | 0.4828                              | 0.01592                 | 3.297431649                |
| 3.575                              | 1.049                               | 0.03934                 | 3.750238322                |
| 3.58                               | 0.7846                              | 0.07519                 | 9.583227122                |
| 3.585                              | 0.5779                              | 0.09877                 | 17.09119225                |
| 3.59                               | 0.2183                              | 0.01887                 | 8.644067797                |
| 3.595                              | 0.211                               | 0.02255                 | 10.68720379                |
| 3.6                                | 0.2494                              | 0.02634                 | 10.56134723                |
| 3.605                              | 0.3094                              | 0.02435                 | 7.870071105                |
| 3.61                               | 0.3243                              | 0.02403                 | 7.409805735                |

|       |        |          |             |
|-------|--------|----------|-------------|
| 3.615 | 0.3386 | 0.0253   | 7.471943296 |
| 3.62  | 0.3456 | 0.02581  | 7.468171296 |
| 3.625 | 0.3482 | 0.02779  | 7.981045376 |
| 3.63  | 0.358  | 0.02801  | 7.824022346 |
| 3.635 | 0.3717 | 0.02871  | 7.723970944 |
| 3.64  | 0.3836 | 0.0311   | 8.107403545 |
| 3.645 | 0.4047 | 0.03202  | 7.912033605 |
| 3.65  | 0.4242 | 0.03572  | 8.420556341 |
| 3.655 | 0.4374 | 0.03766  | 8.609967993 |
| 3.66  | 0.463  | 0.03978  | 8.591792657 |
| 3.665 | 0.5085 | 0.04402  | 8.656833825 |
| 3.67  | 0.5891 | 0.04843  | 8.221015108 |
| 3.675 | 0.6762 | 0.05769  | 8.531499556 |
| 3.68  | 0.8912 | 0.08042  | 9.023788151 |
| 3.685 | 1.752  | 0.1829   | 10.43949772 |
| 3.69  | 5.117  | 0.2876   | 5.62048075  |
| 3.695 | 0.6757 | 0.09391  | 13.89817967 |
| 3.7   | 0.4161 | 0.03048  | 7.325162221 |
| 3.705 | 0.3815 | 0.01483  | 3.887287025 |
| 3.71  | 0.3909 | 0.009875 | 2.52622154  |
| 3.715 | 0.359  | 0.01258  | 3.504178273 |
| 3.72  | 0.3654 | 0.01367  | 3.741105638 |
| 3.725 | 0.3454 | 0.01923  | 5.56745802  |
| 3.73  | 0.3504 | 0.02306  | 6.581050228 |
| 3.735 | 0.3921 | 0.02823  | 7.199693956 |
| 3.74  | 0.4787 | 0.03124  | 6.526007938 |
| 3.745 | 0.5734 | 0.03503  | 6.109173352 |
| 3.75  | 0.6822 | 0.04143  | 6.07299912  |
| 3.755 | 1.273  | 0.05653  | 4.44069128  |
| 3.76  | 0.7254 | 0.0253   | 3.487730907 |
| 3.765 | 0.7734 | 0.04029  | 5.209464701 |
| 3.77  | 1.573  | 0.1066   | 6.776859504 |
| 3.775 | 1.043  | 0.08736  | 8.375838926 |
| 3.78  | 0.7621 | 0.02732  | 3.584831387 |
| 3.785 | 1.009  | 0.06804  | 6.743310208 |
| 3.79  | 1.107  | 0.06205  | 5.605239386 |
| 3.795 | 0.8568 | 0.0361   | 4.213352007 |
| 3.8   | 1.024  | 0.05168  | 5.046875    |
| 3.805 | 1.082  | 0.05303  | 4.901109057 |
| 3.81  | 1.224  | 0.06942  | 5.671568627 |
| 3.815 | 1.506  | 0.09576  | 6.358565737 |
| 3.82  | 2.857  | 0.277    | 9.695484774 |
| 3.825 | 4.364  | 0.2318   | 5.311640697 |
| 3.83  | 5.241  | 0.2897   | 5.527571074 |
| 3.835 | 3.264  | 0.2453   | 7.515318627 |
| 3.84  | 1.152  | 0.1024   | 8.888888889 |



|       |        |         |             |
|-------|--------|---------|-------------|
| 3.845 | 1.318  | 0.08766 | 6.650986343 |
| 3.85  | 1.125  | 0.08792 | 7.815111111 |
| 3.855 | 0.8034 | 0.0622  | 7.742096092 |
| 3.86  | 0.9371 | 0.05798 | 6.187173194 |
| 3.865 | 0.9922 | 0.06826 | 6.879661359 |
| 3.87  | 0.6144 | 0.05974 | 9.723307292 |
| 3.875 | 0.3825 | 0.04918 | 12.85751634 |
| 3.88  | 0.4034 | 0.03701 | 9.174516609 |
| 3.885 | 0.7154 | 0.03284 | 4.590438915 |
| 3.89  | 0.6372 | 0.04529 | 7.107658506 |
| 3.895 | 0.7231 | 0.03817 | 5.278661319 |
| 3.9   | 0.884  | 0.04492 | 5.081447964 |
| 3.905 | 0.8033 | 0.04796 | 5.970372215 |
| 3.91  | 0.5836 | 0.05183 | 8.881082934 |
| 3.915 | 0.4316 | 0.05038 | 11.67284523 |
| 3.92  | 0.2789 | 0.05934 | 21.27644317 |
| 3.925 | 0.1776 | 0.04382 | 24.67342342 |
| 3.93  | 0.1705 | 0.04069 | 23.86510264 |
| 3.935 | 0.1729 | 0.03799 | 21.97223829 |
| 3.94  | 0.1893 | 0.03465 | 18.30427892 |
| 3.945 | 0.1845 | 0.03313 | 17.95663957 |
| 3.95  | 0.175  | 0.03361 | 19.20571429 |
| 3.955 | 0.1688 | 0.03249 | 19.24763033 |
| 3.96  | 0.17   | 0.03044 | 17.90588235 |
| 3.965 | 0.1754 | 0.03079 | 17.55416192 |
| 3.97  | 0.1746 | 0.02992 | 17.13631157 |
| 3.975 | 0.1888 | 0.02702 | 14.31144068 |
| 3.98  | 0.2001 | 0.02587 | 12.92853573 |
| 3.985 | 0.1983 | 0.02558 | 12.899647   |
| 3.99  | 0.2086 | 0.02589 | 12.41131352 |
| 3.995 | 0.2141 | 0.02375 | 11.09294722 |
| 4     | 0.2201 | 0.02401 | 10.90867787 |
| 4.005 | 0.2272 | 0.02323 | 10.22447183 |
| 4.01  | 0.2354 | 0.02232 | 9.48173322  |
| 4.015 | 0.2451 | 0.02085 | 8.506731946 |
| 4.02  | 0.2549 | 0.02017 | 7.912907022 |
| 4.025 | 0.2655 | 0.01935 | 7.288135593 |
| 4.03  | 0.2782 | 0.01777 | 6.387491014 |
| 4.035 | 0.2969 | 0.01535 | 5.17009094  |
| 4.04  | 0.3371 | 0.01404 | 4.164936221 |
| 4.045 | 0.5801 | 0.0568  | 9.791415273 |
| 4.05  | 0.7229 | 0.06259 | 8.658182321 |
| 4.055 | 0.3903 | 0.01396 | 3.576735844 |
| 4.06  | 1.11   | 0.1361  | 12.26126126 |
| 4.065 | 0.7345 | 0.1511  | 20.57181756 |
| 4.07  | 0.2748 | 0.03073 | 11.18267831 |

|       |        |         |             |
|-------|--------|---------|-------------|
| 4.075 | 0.7438 | 0.03649 | 4.90588868  |
| 4.08  | 0.2514 | 0.05894 | 23.44470963 |
| 4.085 | 0.1507 | 0.03657 | 24.26675514 |
| 4.09  | 0.1462 | 0.03336 | 22.81805746 |
| 4.095 | 0.154  | 0.03079 | 19.99350649 |
| 4.1   | 0.147  | 0.03093 | 21.04081633 |
| 4.105 | 0.1461 | 0.02948 | 20.1779603  |
| 4.11  | 0.1503 | 0.02869 | 19.08848969 |
| 4.115 | 0.1449 | 0.0287  | 19.80676329 |
| 4.12  | 0.1399 | 0.0281  | 20.08577555 |
| 4.125 | 0.1417 | 0.02859 | 20.17642908 |
| 4.13  | 0.1497 | 0.02748 | 18.35671343 |
| 4.135 | 0.1634 | 0.02584 | 15.81395349 |
| 4.14  | 0.1647 | 0.02484 | 15.08196721 |
| 4.145 | 0.1754 | 0.02391 | 13.63169897 |
| 4.15  | 0.189  | 0.02366 | 12.51851852 |
| 4.155 | 0.1885 | 0.02466 | 13.08222812 |
| 4.16  | 0.1946 | 0.02428 | 12.47687564 |
| 4.165 | 0.2001 | 0.02394 | 11.96401799 |
| 4.17  | 0.2064 | 0.0222  | 10.75581395 |
| 4.175 | 0.213  | 0.02121 | 9.957746479 |
| 4.18  | 0.2272 | 0.02172 | 9.559859155 |
| 4.185 | 0.2314 | 0.02026 | 8.755401901 |
| 4.19  | 0.2434 | 0.0197  | 8.093672966 |
| 4.195 | 0.2585 | 0.01814 | 7.017408124 |
| 4.2   | 0.2742 | 0.01814 | 6.615609044 |
| 4.205 | 0.3037 | 0.01669 | 5.495554824 |
| 4.21  | 0.3632 | 0.01583 | 4.358480176 |
| 4.215 | 0.6533 | 0.0563  | 8.617786622 |
| 4.22  | 1.303  | 0.08166 | 6.267075979 |
| 4.225 | 0.3189 | 0.02341 | 7.340859204 |
| 4.23  | 0.6032 | 0.07763 | 12.86969496 |
| 4.235 | 0.9297 | 0.09634 | 10.36248252 |
| 4.24  | 0.164  | 0.03871 | 23.60365854 |
| 4.245 | 0.151  | 0.0338  | 22.38410596 |
| 4.25  | 0.1507 | 0.031   | 20.57067021 |
| 4.255 | 0.1534 | 0.02965 | 19.3285528  |
| 4.26  | 0.1611 | 0.02832 | 17.57914339 |
| 4.265 | 0.1724 | 0.02688 | 15.59164733 |
| 4.27  | 0.1884 | 0.02491 | 13.22186837 |
| 4.275 | 0.2064 | 0.02536 | 12.28682171 |
| 4.28  | 0.2279 | 0.02209 | 9.69284774  |
| 4.285 | 0.2494 | 0.02142 | 8.58861267  |
| 4.29  | 0.2551 | 0.02289 | 8.972951784 |
| 4.295 | 0.2624 | 0.02067 | 7.877286585 |
| 4.3   | 0.2589 | 0.02107 | 8.138277327 |
